# Supplementary material for: Food Banks against Climate Change, a Solution That Works: A Case Study in Navarra, Spain
Source: MDPI journal article supplement (doi:10.3390/foods11223645), 2022-11-15
Supplement: s1 [file s1]

## Supplementary material for

### Food banks against climate change, a solution that works: the case of Navarra, Spain

Josemi G. Penalver <sup>1</sup>, Alejandra Armijos <sup>2</sup>, Beatriz Soret <sup>3,4</sup> and Maite M. Aldaya <sup>4\*</sup>

<sup>1</sup> School of Agricultural Engineering and Biosciences, Public University of Navarra (UPNA), Arrosadia Campus, 31006 Pamplona, Spain

<sup>2</sup> Institute for Sustainability & Food Chain Innovation (IS-FOOD), Public University of Navarra (UPNA), Arrosadia Campus, 31006 Pamplona, Spain

\* Correspondence: maite.aldaya@unavarra.es

Table S1: Activities and emission factors of the Food Bank of Navarra carbon footprint, Scope 1 (2018).

| Emission source                 | Activity data | Unit  | Emission factor | Unit                    | Comments                   | Source        | Emissions | Unit               |
|---------------------------------|---------------|-------|-----------------|-------------------------|----------------------------|---------------|-----------|--------------------|
| Consumption of natural gas      | 52442         | kWh   | 0.183           | kg CO <sub>2</sub> /kWh | Year 2018                  | MITECO (2019) | 9597      | kg CO <sub>2</sub> |
| Vehicle type                    | Activity data | Unit  | Fuel type       | Emission factor         | Unit                       | Source        | Emissions | Unit               |
| FBN's van                       | 5951.5        | litre | Diesel A or B   | 2.493                   | kg CO <sub>2</sub> e/litre | MITECO (2020) | 14837     | kg CO <sub>2</sub> |
| Vehicle type                    | Activity data | Unit  | Gas name        | Emission factor         | Unit                       | Source        | Emissions | Unit               |
| Recharging of refrigerant gases | 0             | litre |                 |                         | kg CO <sub>2</sub> e/litre | MITECO (2020) | 0         | kg CO <sub>2</sub> |

MITECO, Ministerio para la Transición Ecológica y el Reto Demográfico (2019 and 2020) *Carbon footprint calculator* [Online] <https://www.miteco.gob.es/es/cambio-climatico/temas/mitigacion-politicas-y-medidas/calculadoras.aspx>.

Table S2: Activities and emission factors of the Food Bank of Navarra carbon footprint, Scope 2 (2018).

| Facilities | Emission source | Activity data | Unit | Trading company | Emission factor | Unit | Comments | Source | Emissions | Unit |
|------------|-----------------|---------------|------|-----------------|-----------------|------|----------|--------|-----------|------|
|------------|-----------------|---------------|------|-----------------|-----------------|------|----------|--------|-----------|------|

|                 |                         |       |     |                           |      |                          |                        |               |             |                           |
|-----------------|-------------------------|-------|-----|---------------------------|------|--------------------------|------------------------|---------------|-------------|---------------------------|
| <b>Pamplona</b> | Electricity consumption | 74023 | kWh | EMASP S. COOP             | 0    | Kg CO <sub>2</sub> e/kWh | Year 2018, wind energy | MITECO (2019) | 0           | kg CO <sub>2</sub> e      |
| <b>Tudela</b>   | Electricity consumption | 10185 | kWh | Iberdrola Clientes S.A.U. | 0.27 | Kg CO <sub>2</sub> e/kWh | Year 2018              | MITECO (2019) | 2750        | kg CO <sub>2</sub> e      |
| <b>Total</b>    |                         |       |     |                           |      |                          |                        |               | <b>2750</b> | <b>kg CO<sub>2</sub>e</b> |

MITECO, Ministerio para la Transición Ecológica y el Reto Demográfico (2019) *Carbon footprint calculator* [Online] <https://www.miteco.gob.es/es/cambio-climatico/temas/mitigacion-politicas-y-medidas/calculadoras.aspx>.

Table S3: Activities and emission factors of the Food Bank of Navarra carbon footprint, Scope 3, Upstream. Transport associated with food inputs (2018).

| Origin                                                         | Type of vehicle                 | Fuel type**    | Distance travelled | Unit      | Speed          | Emission factor | Unit                    | Source      | Emissions   | Unit                      |
|----------------------------------------------------------------|---------------------------------|----------------|--------------------|-----------|----------------|-----------------|-------------------------|-------------|-------------|---------------------------|
| <b>Manufacturers and distributors *</b>                        | Van (19%)                       | Gasoline (17%) | 331                | km        | High (87 km/h) | 0.26            | kg CO <sub>2</sub> e/km | OCCC (2020) | 87          | kg CO <sub>2</sub> e      |
|                                                                |                                 | Gasoil (83%)   | 1614               | km        | High (87 km/h) | 0.20            | kg CO <sub>2</sub> e/km | OCCC (2020) | 330         | kg CO <sub>2</sub> e      |
|                                                                | Rigid lorry > 14 t (31%)        | -              | 3173               | km        | High (87 km/h) | 0.45            | kg CO <sub>2</sub> e/km | OCCC (2020) | 1436        | kg CO <sub>2</sub> e      |
|                                                                | Articulated lorry <= 34 t (47%) | -              | 4811               | km        | High (87 km/h) | 0.50            | kg CO <sub>2</sub> e/km | OCCC (2020) | 2406        | kg CO <sub>2</sub> e      |
|                                                                | Articulated lorry > 34 t (3%)   | -              | 307                | km        | High (87 km/h) | 0.56            | kg CO <sub>2</sub> e/km | OCCC (2020) | 172         | kg CO <sub>2</sub> e      |
|                                                                | <b>Total</b>                    | -              | <b>10236</b>       | <b>km</b> |                |                 |                         |             | <b>4431</b> | <b>kg CO<sub>2</sub>e</b> |
| <b>The Fund for European Aid to the Most Deprived program*</b> | Articulated lorry > 34 t        | -              | 23350              | km        | High (87 km/h) | 0.56            | kg CO <sub>2</sub> e/km | OCCC (2020) | 13075       | kg CO <sub>2</sub> e      |
| <b>Food collections*</b>                                       | Rigid lorry < 14 t (5%)         | -              | 213                | km        | High (87 km/h) | 0.40            | kg CO <sub>2</sub> e/km | OCCC (2020) | 85          | kg CO <sub>2</sub> e      |

|                                                   |                                 |                  |              |           |                                                                  |       |                         |             |              |                           |
|---------------------------------------------------|---------------------------------|------------------|--------------|-----------|------------------------------------------------------------------|-------|-------------------------|-------------|--------------|---------------------------|
|                                                   | Rigid lorry > 14 t (10%)        | -                | 426          | km        | High (87 km/h)                                                   | 0.45  | kg CO <sub>2</sub> e/km | OCCC (2020) | 193          | kg CO <sub>2</sub> e      |
|                                                   | Articulated lorry <= 34 t (36%) | -                | 1464         | km        | High (87 km/h)                                                   | 0.50  | kg CO <sub>2</sub> e/km | OCCC (2020) | 732          | kg CO <sub>2</sub> e      |
|                                                   | Articulated lorry > 34 t (49%)  | -                | 2011         | km        | High (87 km/h)                                                   | 0.56  | kg CO <sub>2</sub> e/km | OCCC (2020) | 1126         | kg CO <sub>2</sub> e      |
|                                                   | <b>Total</b>                    |                  | <b>4114</b>  | <b>km</b> |                                                                  |       |                         |             | <b>2136</b>  | <b>kg CO<sub>2</sub>e</b> |
| <b>PRC</b>                                        | Van                             | Gasoline (15.4%) | 8609         | km        | Average between urban speed(21 km/h) and average speed (62 km/h) | 0.26  | kg CO <sub>2</sub> e/km | OCCC (2020) | 2271         | kg CO <sub>2</sub> e      |
|                                                   |                                 | Gasoil (84.6%)   | 47296        | km        | Average between urban speed(21 km/h) and average speed (62 km/h) | 0.20  | kg CO <sub>2</sub> e/km | OCCC (2020) | 9681         | kg CO <sub>2</sub> e      |
|                                                   | <b>Total</b>                    | -                | <b>55905</b> | <b>km</b> |                                                                  |       |                         |             | <b>11951</b> | <b>kg CO<sub>2</sub>e</b> |
| <b>Fruit and Vegetable Producers Organisation</b> | Articulated lorry > 34 t        | -                | 23397        | km        | High (87 km/h)                                                   | 0.56  | kg CO <sub>2</sub> e/km | OCCC (2020) | 13101        | kg CO <sub>2</sub> e      |
| <b>Others food banks</b>                          | Articulated lorry<=34t          | -                | 1110         | km        | High (87 km/h)                                                   | 0.50  | kg CO <sub>2</sub> e/km | OCCC (2020) | 555          | kg CO <sub>2</sub> e      |
| <b>Food donations</b>                             | Passenger car (75%)             | Gasoline (38.0%) | 48           | km        | Average between urban speed(21                                   | 0.185 | kg CO <sub>2</sub> e/km | OCCC (2020) | 9            | kg CO <sub>2</sub> e      |

|                                              |                  |                |    | km/h) and<br>average speed<br>(69 km/h)                                         |                                                                                 |                         |                         |             |                      |                      |
|----------------------------------------------|------------------|----------------|----|---------------------------------------------------------------------------------|---------------------------------------------------------------------------------|-------------------------|-------------------------|-------------|----------------------|----------------------|
|                                              |                  | Gasoil (62.0%) | 78 | km                                                                              | Average<br>between urban<br>speed(21<br>km/h) and<br>average speed<br>(69 km/h) | 0.166                   | kg CO <sub>2</sub> e/km | OCCC (2020) | 13                   | kg CO <sub>2</sub> e |
| Van (25%)                                    | Gasoline (15.4%) | 6              | km | Average<br>between urban<br>speed(21<br>km/h) and<br>average speed<br>(62 km/h) | 0.26                                                                            | kg CO <sub>2</sub> e/km | OCCC (2020)             | 2           | kg CO <sub>2</sub> e |                      |
|                                              | Gasoil (84.6%)   | 36             | km | Average<br>between urban<br>speed(21<br>km/h) and<br>average speed<br>(62 km/h) | 0.20                                                                            | kg CO <sub>2</sub> e/km | OCCC (2020)             | 7           | kg CO <sub>2</sub> e |                      |
| Total                                        |                  | 168            |    |                                                                                 |                                                                                 |                         |                         | 31          | kg CO <sub>2</sub> e |                      |
| Total transport associated with food inflows |                  |                |    |                                                                                 |                                                                                 |                         |                         | 45281       | kg CO <sub>2</sub> e |                      |

OCCC, Oficina Catalana del Cambio Climático (2020) *Calculation of GHG emissions derived from municipal waste management.*

\* Part of the transport carried out by the FBN.

\*\* Percentages according to the number of vehicles in Navarre in the case of the PRC and collections. Percentage according to the number of vehicles in Spain in the case of Manufacturers and Distributors.

Table S4: Activities and emission factors of the Food Bank of Navarra carbon footprint, Scope 3, Downstream. Transport to social entities (2018).

| Destination                               | Type of vehicle        | Fuel type*     | Distance travelled | Unit      | Speed           | Emission factor | Unit                    | Source      | Emissions    | Unit                      |
|-------------------------------------------|------------------------|----------------|--------------------|-----------|-----------------|-----------------|-------------------------|-------------|--------------|---------------------------|
| Entities in Navarre                       | Passenger car          | Gasoline 38.0% | 24817              | km        | High (102 km/h) | 0.15            | kg CO <sub>2</sub> e/km | OCCC (2020) | 3723         | kg CO <sub>2</sub> e      |
|                                           | Passenger car          | Gasoil 62.0%   | 40491              | km        | High (102 km/h) | 0.15            | kg CO <sub>2</sub> e/km | OCCC (2020) | 5899         | kg CO <sub>2</sub> e      |
|                                           | Van                    | Gasoline 15.4% | 10057              | km        | High (92 km/h)  | 0.19            | kg CO <sub>2</sub> e/km | OCCC (2020) | 1872         | kg CO <sub>2</sub> e      |
|                                           | Van                    | Gasoil 84.6%   | 55250              | km        | High (92 km/h)  | 0.18            | kg CO <sub>2</sub> e/km | OCCC (2020) | 10130        | kg CO <sub>2</sub> e      |
| <b>Total</b>                              |                        |                | <b>130616</b>      | <b>km</b> |                 |                 |                         |             | <b>21624</b> | <b>kg CO<sub>2</sub>e</b> |
| Others food banks                         | Articulated lorry<=34t | -              | 11677              | km        | High (87 km/h)  | 0.50            | kg CO <sub>2</sub> e/km | OCCC (2020) | 5840         | kg CO <sub>2</sub> e      |
| <b>Total transport to social entities</b> |                        |                |                    |           |                 |                 |                         |             | <b>27463</b> | <b>kg CO<sub>2</sub>e</b> |

OCCC, Oficina Catalana del Cambio Climático (2020) *Calculation of GHG emissions derived from municipal waste management.*

\* Fuel type according to the percentage of the vehicle fleet in Navarre. Year 2018.

Table S5: Activities and emission factors of the Food Bank of Navarra carbon footprint, Scope 3, Total transport of goods (2018).

|                                | Emissions    | Unit                      |
|--------------------------------|--------------|---------------------------|
| <b>Total transport of food</b> | <b>72744</b> | <b>kg CO<sub>2</sub>e</b> |

Table S6: Activities and emission factors of the Food Bank of Navarra carbon footprint, Scope 3. Downstream: Staff and volunteer transport, Transport of volunteers, private vehicle (2018).

| Origin       | Type of vehicle | Fuel type | Distance travelled (km) | Speed                                                            | Emission factor kg CO <sub>2</sub> e/km | Source      | Emissions Kg CO <sub>2</sub> e |
|--------------|-----------------|-----------|-------------------------|------------------------------------------------------------------|-----------------------------------------|-------------|--------------------------------|
| Pamplona     | Motorbike       | Gasoline  | 5670                    | Average between urban speed(25 km/h) and average speed (69 km/h) | 0.099                                   | OCCC (2020) | 562                            |
| Pamplona     | Passenger car   | Diesel    | 130617                  | Average between urban speed(21 km/h) and average speed (69 km/h) | 0.166                                   | OCCC (2020) | 21737                          |
|              | Passenger car   | Gasoline  | 96205                   | Average between urban speed(21 km/h) and average speed (69 km/h) | 0.185                                   | OCCC (2020) | 17776                          |
|              | Passenger car   | Hybrid    | 8910                    | Average between urban speed(21 km/h) and average speed (69 km/h) | 0.093                                   | OCCC (2020) | 826                            |
| Pamplona     | Van             | Diesel    | 4320                    | Average between urban speed(21 km/h) and average speed (62 km/h) | 0.205                                   | OCCC (2020) | 884                            |
| Tudela       | Passenger car   | Diesel    | 2880                    | Average between urban speed(21 km/h) and average speed (69 km/h) | 0.166                                   | OCCC (2020) | 479                            |
| Tudela       | Passenger car   | Gasoline  | 6165                    | Average between urban speed(21 km/h) and average speed (69 km/h) | 0.185                                   | OCCC (2020) | 1139                           |
| <b>Total</b> |                 |           |                         |                                                                  |                                         |             | <b>43404</b>                   |

OCCC, Oficina Catalana del Cambio Climático (2020) Calculation of GHG emissions derived from municipal waste management.

Table S7: Activities and emission factors of the Food Bank of Navarra carbon footprint, Scope 3. Downstream: Transport of volunteers. Public transport (2018).

| Origin            | Distance travelled (km) | Average occupancy* | Unit           | Emission factor | Unit                              | Source      | Emissions Kg CO <sub>2</sub> e |
|-------------------|-------------------------|--------------------|----------------|-----------------|-----------------------------------|-------------|--------------------------------|
| City bus Pamplona | 10560                   | 16                 | Passengers/bus | 0.08074         | kg CO <sub>2</sub> e/Passenger/km | OCCC (2020) | 53                             |

OCCC, Oficina Catalana del Cambio Climático (2020) Calculation of GHG emissions derived from municipal waste management.

\*Average occupation according to OCCC.

Table S8: Activities and emission factors of the Food Bank of Navarra carbon footprint, Scope 3. Downstream: Total volunteer transport (2018).

|                              | Emissions    | Unit                      |
|------------------------------|--------------|---------------------------|
| <b>Total staff transport</b> | <b>43457</b> | <b>kg CO<sub>2</sub>e</b> |

Table S9: Activities and emission factors of the Food Bank of Navarra carbon footprint, Scope 3. Consumption of goods and services (2018).

| Emission source         | Activity data | Unit           | Emission factor | Unit                                | Comments                   | Source     | Others                                                  | Emissions (Kg CO <sub>2</sub> e) | Uncertainty |
|-------------------------|---------------|----------------|-----------------|-------------------------------------|----------------------------|------------|---------------------------------------------------------|----------------------------------|-------------|
| Purchase of cardboard * | 8.85          | T of cardboard | 390             | kg CO <sub>2</sub> e/t of cardboard | Weight of one box (200 gr) | ADEME      | New cardboard (not recycled)                            | 3452                             | 20%         |
| Purchase of wood *      | 0.82          | T of wood      | 36.7            | kg CO <sub>2</sub> e/t of wood      | Weight of one box (2 kg)   | ADEME      | Short-lived wood (furniture ...) - upstream manufacture | 30                               | 50%         |
| Drinking water supply 1 | 140           | m <sup>3</sup> | 0.081           | kg CO <sub>2</sub> e/m <sup>3</sup> |                            | PRC (2018) |                                                         | 11                               |             |
| Drinking water supply 2 | 126           | m <sup>3</sup> | 0.081           | kg CO <sub>2</sub> e/m <sup>3</sup> |                            | PRC (2018) |                                                         | 10                               |             |
| <b>Total</b>            |               |                |                 |                                     |                            |            |                                                         | <b>3503</b>                      |             |

ADEME, Agence de la transition écologique (2020) Base de données Bilan Carbone, Base Carbone V11 [Online] <https://www.bilans-ges.ademe.fr/en/accueil>.

PRC (2018) personal communication from Álvaro Miranda, from the PRC, April 16, 2020

\* These purchases are of industrial packaging for the transport and storage of foodstuffs.

Table S10: Greenhouse gas emissions from the different activities of the Food Bank of Navarra by scope in 2018 (tonnes of CO<sub>2</sub>e)

|                |                                        | Emissions<br>(t CO <sub>2</sub> e ) | Emissions<br>(%) |
|----------------|----------------------------------------|-------------------------------------|------------------|
| <b>Scope 1</b> | Fixed combustion                       | 9.6                                 | 6.5 %            |
|                | Transportation fuel consumption        | 14.8                                | 10.1 %           |
|                | refrigerant gas recharge               | 0                                   | 0 %              |
| <b>Scope 2</b> | Electricity consumption in Berrioplano | 0                                   | 0 %              |
|                | Electricity consumption in Tudela      | 3                                   | 2 %              |
| <b>Scope 3</b> | Transport of food inflows              | 45.3                                | 30.8 %           |
|                | Transport of food outflows             | 27.7                                | 18.8 %           |
|                | Transport of volunteers and staff      | 43.2                                | 29.3 %           |
|                | Consumption of goods and services      | 3.6                                 | 2.4 %            |

Table S11: Activities and emission factors in a scenario without the FBN, Additional food production (2018).

| Category*                  | Activity data | Units | Emission factor<br>(kg CO <sub>2</sub> e/kg o L) | Source        | Others                   | Emissions<br>(kg CO <sub>2</sub> e) | Uncertainty |
|----------------------------|---------------|-------|--------------------------------------------------|---------------|--------------------------|-------------------------------------|-------------|
| <b>Infant food</b>         |               |       |                                                  |               |                          |                                     |             |
| Infant food                | 160           | kg    | 2.00                                             | Veolia (2016) | Baby food                | 321                                 |             |
| Infant cereals in porridge | 118           | kg    | 2.000                                            | Veolia (2016) | Baby food                | 235                                 |             |
| <b>Unscheduled food</b>    |               |       |                                                  |               |                          |                                     |             |
| Unscheduled food           | 146540        | kg    | 2.000                                            | Veolia (2016) | Miscellaneous foodstuffs | 293080                              |             |



|                                      |        |    |       |                      |                                                                                                                                                                                                        |        |     |
|--------------------------------------|--------|----|-------|----------------------|--------------------------------------------------------------------------------------------------------------------------------------------------------------------------------------------------------|--------|-----|
| <b>Frozen unsorted food</b>          | 68849  | kg | 3.475 | Veolia (2016)        | Average of fruits (0.671), vegetables (0.671), pasta (2.766), fish (2.870) and frozen meats (10.395).                                                                                                  | 239222 |     |
| <b>Drinks</b>                        |        |    |       |                      |                                                                                                                                                                                                        |        |     |
| <b>Flavoured shakes</b>              | 1409   | l  | 1.3   | ECODES MITECO (2019) | Shakes                                                                                                                                                                                                 | 1831   |     |
| <b>Water without gas</b>             | 15     | kg | 0.393 | ADEME                | PET bottled water, 0.5L - in the shop, ready to drink                                                                                                                                                  | 6      | 30% |
| <b>Cola drink</b>                    | 135    | l  | 1.090 | ADEME                | Soda - cola - in shop, ready to drink                                                                                                                                                                  | 147    | 30% |
| <b>Orange soft drinks</b>            | 35     | l  | 2.220 | ADEME                | Orange juice                                                                                                                                                                                           | 78     | 30% |
| <b>Drink without gas</b>             | 422    | l  | 1.307 | ADEME                | Average between PET water bottle and orange juice in shop                                                                                                                                              | 552    | 30% |
| <b>Assorted juices and nectars</b>   | 109573 | kg | 2.220 | ADEME                | Orange juice - pure juice - in shop, ready to drink                                                                                                                                                    | 243252 | 30% |
| <b>A variety of soft drinks</b>      | 13899  | kg | 1.655 | ADEME                | Average between orange juice and cola soda                                                                                                                                                             | 23002  | 30% |
| <b>Pastries, biscuits and sweets</b> |        |    |       |                      |                                                                                                                                                                                                        |        |     |
| <b>Assorted biscuits</b>             | 13131  | kg | 2.508 | Veolia (2016)        | Biscuits                                                                                                                                                                                               | 32934  |     |
| <b>Sweet pastries</b>                | 379    | kg | 2.525 | ADEME                | Average cheesecake (0.764 kgCO <sub>2</sub> e/serving, portion 0.217), strawberry tart (0.345 kgCO <sub>2</sub> e/serving, portion 0.139) apple tart (0.283 kgCO <sub>2</sub> e/serving, portion 0.18) | 957    | 30% |
| <b>Assorted jams</b>                 | 48     | kg | 2.176 | Veolia (2016)        | Confectionery                                                                                                                                                                                          | 104    |     |
| <b>Assorted marmalades</b>           | 48866  | kg | 2.176 | Veolia (2016)        | Confectionery                                                                                                                                                                                          | 106333 |     |

|                                           |       |    |       |                     |                                                                                                                                                                                                        |       |     |
|-------------------------------------------|-------|----|-------|---------------------|--------------------------------------------------------------------------------------------------------------------------------------------------------------------------------------------------------|-------|-----|
| <b>Assorted honey</b>                     | 216   | kg | 0.960 | Observatorio CO2web | Honey                                                                                                                                                                                                  | 208   |     |
| <b>Candies</b>                            | 0     | kg | 2.176 | Veolia (2016)       |                                                                                                                                                                                                        | 0     |     |
| <b>Confectionery</b>                      | 134   | kg | 2.525 | ADEME               | Average cheesecake (0.764 kgCO <sub>2</sub> e/serving, portion 0.217), strawberry tart (0.345 kgCO <sub>2</sub> e/serving, portion 0.139) apple tart (0.283 kgCO <sub>2</sub> e/serving, portion 0.18) | 339   | 30% |
| <b>Nougats, polvorones and chocolates</b> | 559   | kg | 2.176 | Veolia (2016)       | Confectionery                                                                                                                                                                                          | 1216  |     |
| <b>Assorted pastries</b>                  | 38214 | kg | 2.28  | ADEME               | pastries - chocolate pastry - net weight in shop                                                                                                                                                       | 87128 | 30% |
| <b>Cocoa and chocolate</b>                |       |    |       |                     |                                                                                                                                                                                                        |       |     |
| <b>Soluble cocoa (Colacao)</b>            | 2474  | kg | 4.700 | ADEME               | Chocolate powder, unsweetened - net weight in shop. Same perimeter as ingredients purchased in bulk. FE variation for this ingredient: Total product consumption - Conversion factor: 100%.            | 11629 | 30% |
| <b>Chocolate powder</b>                   | 3     | kg | 4.700 | ADEME               | Chocolate powder, unsweetened - net weight in shop. Same perimeter as ingredients purchased in bulk. FE variation for this ingredient: Total product consumption - Conversion factor: 100%.            | 14    | 30% |
| <b>Chocolate sweets</b>                   | 177   | kg | 5.870 | ADEME               | Milk chocolate, lumps - net weight in shop                                                                                                                                                             | 1038  | 30% |
| <b>Chocolates in bars</b>                 | 257   | kg | 5.870 | ADEME               | Milk chocolate, lumps - net weight in shop                                                                                                                                                             | 1508  | 30% |

|                                        |       |    |        |                      |                                                                                                           |        |     |
|----------------------------------------|-------|----|--------|----------------------|-----------------------------------------------------------------------------------------------------------|--------|-----|
| <b>Coffee and infusions</b>            |       |    |        |                      |                                                                                                           |        |     |
| <b>Assorted coffee</b>                 | 488   | kg | 3.140  | ADEME                | Ground coffee - net weight in shop                                                                        | 1531   | 30% |
| <b>Assorted infusions</b>              | 1257  | kg | 6.110  | ADEME                | Tea - for infusion - net weight in shop                                                                   | 7679   | 30% |
| <b>Meats</b>                           |       |    |        |                      |                                                                                                           |        |     |
| <b>Cured ham</b>                       | 425   | kg | 9.310  | ECODES MITECO (2019) | Ham and cured pork shoulder                                                                               | 3959   |     |
| <b>Cured sausages, chorizo</b>         | 19691 | kg | 5.120  | ADEME                | Salchichon (pork)                                                                                         | 100820 | 30% |
| <b>Assorted canned pâté</b>            | 6     | kg | 10.395 | Veolia (2016)        | Canned pâté                                                                                               | 58     |     |
| <b>Packaged meats</b>                  | 2     | kg | 4.390  | ADEME                | Pork sausage, but net in shop                                                                             | 11     | 30% |
| <b>Canned meat</b>                     | 3     | kg | 4.39   | ADEME                | Pork sausage                                                                                              | 11     | 30% |
| <b>Assorted cured sausages</b>         | 13379 | kg | 5.120  | ADEME                | Salchichon (pork)                                                                                         | 68502  | 30% |
| <b>Assorted cold meats</b>             | 163   | kg | 5.120  | ADEME                | Salchichon (pork)                                                                                         | 835    | 30% |
| <b>Cereals, flour, bread and pasta</b> |       |    |        |                      |                                                                                                           |        |     |
| <b>Various pastas</b>                  | 1903  | kg | 1.48   | ADEME                | Paste - dry - net weight shop                                                                             | 2817   | 30% |
| <b>Macaroni</b>                        | 2409  | kg | 1.48   | ADEME                | Paste - dry - net weight shop                                                                             | 3566   | 30% |
| <b>Spaguetti</b>                       | 4624  | kg | 1.48   | ADEME                | Paste - dry - net weight shop                                                                             | 6844   | 30% |
| <b>Rice</b>                            | 14709 | kg | 4.230  | ADEME                | Rice - jasmine, Thailand - net weight in shop                                                             | 62219  | 30% |
| <b>Corn</b>                            | 9     | kg | 0.869  | ADEME                | Cereal bowl - ready-to-eat dishes. Mass of consumable ingredients in the bowl for one serving (kg): 0.337 | 8      | 30% |

|                              |       |    |       |               |                                                                                                                    |       |     |
|------------------------------|-------|----|-------|---------------|--------------------------------------------------------------------------------------------------------------------|-------|-----|
| Sliced bread                 | 10305 | kg | 1.520 | ADEME         | Bread - net weight in shop.<br>Wheat flour                                                                         | 15664 | 30% |
| Toasted bread                | 5067  | kg | 1.520 | ADEME         | Bread - net weight in shop.<br>Wheat flour                                                                         | 7702  | 30% |
| Breakfast cereals            | 1824  | kg | 0.869 | ADEME         | Cereal bowl - ready-to-eat dishes.<br>Mass of consumable ingredients<br>in the bowl for one serving (kg):<br>0.337 | 1586  | 30% |
| Flour                        | 1774  | kg | 1.170 | ADEME         | Flour - wheat - net weight in shop                                                                                 | 2075  | 30% |
|                              |       |    |       |               |                                                                                                                    |       |     |
| Condiments and sauces        |       |    |       |               |                                                                                                                    |       |     |
| Assorted vinegar             | 573   | l  | 4.17  | ADEME         | Wine vinegar - net weight in<br>shop. 1.2 kg of grapes to make 1<br>litre of wine vinegar.                         | 2391  | 30% |
| Salt                         | 2     | kg | 0.544 | ADEME         | Salt - net weight in shop                                                                                          | 1     | 30% |
| Oil                          | 9995  | kg | 2.11  | ADEME         | Half olive and sunflower oil - net<br>weight in shop.                                                              | 21089 | 30% |
| Sugar                        | 2385  | kg | 0.682 | ADEME         | Beet sugar, refined - net weight in<br>shop. 90% of sugar consumption<br>in France                                 | 1626  | 30% |
| Assorted prepared<br>sauces  | 30336 | kg | 2.940 | ADEME         | Tomato sauce - net weight in<br>shop. Same perimeter as<br>ingredients purchased in bulk.                          | 89188 | 30% |
| Mayonnaise                   | 2128  | kg | 2.000 | Veolia (2016) | Miscellaneous foods                                                                                                | 4255  |     |
| Ketchup                      | 16347 | kg | 2.4   | ADEME         | Ketchup - net weight in shop                                                                                       | 39232 | 30% |
| Mustard                      | 3565  | kg | 3.27  | ADEME         | Condiment. Mustard - net weight<br>in shop                                                                         | 11658 | 30% |
|                              |       |    |       |               |                                                                                                                    |       |     |
| Canned<br>vegetables/legumes |       |    |       |               |                                                                                                                    |       |     |

|                                                          |       |    |       |               |                                                    |       |
|----------------------------------------------------------|-------|----|-------|---------------|----------------------------------------------------|-------|
| <b>Cooked red kidney beans</b>                           | 17658 | kg | 0.873 | Veolia (2016) | Canned vegetables/legumes                          | 15415 |
| <b>Cooked or canned mixed legumes</b>                    | 86097 | kg | 0.873 | Veolia (2016) | Canned vegetables/legumes                          | 75163 |
| <b>Cooked beans with vegetables</b>                      | 14873 | kg | 0.873 | Veolia (2016) | Canned vegetables/legumes                          | 12985 |
| <b>Cooked chickpeas</b>                                  | 20427 | kg | 0.873 | Veolia (2016) | Canned vegetables/legumes                          | 17833 |
| <b>Cooked lentils in their natural state</b>             | 95107 | kg | 0.873 | Veolia (2016) | Canned vegetables/vegetables                       | 83028 |
| <b>Canned vegetables artichoke hearts</b>                | 3432  | kg | 0.873 | Veolia (2016) | Canned vegetables                                  | 2996  |
| <b>Canned vegetables white asparagus</b>                 | 5089  | kg | 0.873 | Veolia (2016) | Canned asparagus, Origin China, net weight in shop | 4443  |
| <b>Canned vegetables thin peas</b>                       | 27739 | kg | 0.873 | Veolia (2016) | Canned peas, net weight in shop                    | 24216 |
| <b>Canned vegetables green beans</b>                     | 9754  | kg | 0.873 | Veolia (2016) | Canned vegetables                                  | 8515  |
| <b>Canned vegetables maíz dulce</b>                      | 8785  | kg | 0.873 | Veolia (2016) | Canned vegetables                                  | 7669  |
| <b>Canned vegetables cooked chard</b>                    | 11487 | kg | 0.873 | Veolia (2016) | Canned vegetables                                  | 10028 |
| <b>Canned vegetables celery strips</b>                   | 5904  | kg | 0.873 | Veolia (2016) | Canned vegetables                                  | 5154  |
| <b>Canned vegetables mixed vegetables</b>                | 325   | kg | 0.873 | Veolia (2016) | Canned vegetables                                  | 284   |
| <b>Canned vegetables whole potatoes</b>                  | 5437  | kg | 0.873 | Veolia (2016) | Canned vegetables                                  | 4747  |
| <b>Canned vegetables cooked beetroot</b>                 | 261   | kg | 0.873 | Veolia (2016) | Canned vegetables                                  | 228   |
| <b>Canned vegetables canned peppers piquillo peppers</b> | 1504  | kg | 0.873 | Veolia (2016) | Canned vegetables                                  | 1313  |

|                                   |        |    |       |               |                                                                                                                  |        |     |
|-----------------------------------|--------|----|-------|---------------|------------------------------------------------------------------------------------------------------------------|--------|-----|
| <b>Canned vegetables mushroom</b> | 866    | kg | 0.873 | Veolia (2016) | Canned vegetables                                                                                                | 756    |     |
| <b>Canned vegetables carrot</b>   | 1193   | kg | 0.873 | Veolia (2016) | Canned vegetables                                                                                                | 1042   |     |
| <b>Canned mixed vegetables</b>    | 47737  | kg | 0.873 | Veolia (2016) | Canned vegetables                                                                                                | 41675  |     |
|                                   |        |    |       |               |                                                                                                                  |        |     |
| <b>Fruits</b>                     |        |    |       |               |                                                                                                                  |        |     |
| <b>Cherry</b>                     | 13824  | kg | 0.663 | ADEME         | Cherry - net weight in shop                                                                                      | 9165   | 30% |
| <b>Plum</b>                       | 26000  | kg | 0.259 | ADEME         | Fruit (or vegetable) - generic, seasonal, locally produced - net in-store weight                                 | 6734   | 30% |
| <b>Apple</b>                      | 30890  | kg | 0.259 | ADEME         | Apple France - net weight in shop                                                                                | 8000   | 30% |
| <b>Peach</b>                      | 19863  | kg | 0.346 | ADEME         | Peach France - net weight in shop                                                                                | 6873   | 30% |
| <b>Melon</b>                      | 23360  | kg | 0.313 | ADEME         | Melon - net weight in shop                                                                                       | 7312   | 30% |
| <b>Orange</b>                     | 140940 | kg | 0.500 | ADEME         | Half orange, fresh and for industry - net weight in shop                                                         | 70470  | 30% |
| <b>Nectarine</b>                  | 22530  | kg | 0.346 | ADEME         | Peach France - net weight in shop                                                                                | 7795   | 30% |
| <b>Pear</b>                       | 38151  | kg | 0.45  | ADEME         | Representative of a pear produced in Belgium, use this value for French production.                              | 17168  | 30% |
| <b>Papaya</b>                     | 44552  | kg | 2.24  | ADEME         | Fruit (or vegetable) - generic, out of season, produced in a climate-controlled greenhouse - net in-store weight | 99796  | 30% |
| <b>Banana</b>                     | 11618  | kg | 0.698 | ADEME         | Banana - net retail weight                                                                                       | 8109   | 30% |
| <b>Grape</b>                      | 6525   | kg | 0.642 | ADEME         | Grapes - net weight in shop                                                                                      | 4189   | 30% |
| <b>Fresh fruit</b>                | 57050  | kg | 0.259 | ADEME         | Fruit (or vegetable) - generic, seasonal, locally produced - net weight in shop                                  | 14776  | 30% |
| <b>Tangerines</b>                 | 267574 | kg | 0.767 | ADEME         | Tangerine - net weight in shop                                                                                   | 205230 | 30% |

|                               |       |    |       |                     |                                                                     |       |     |
|-------------------------------|-------|----|-------|---------------------|---------------------------------------------------------------------|-------|-----|
| <b>Canned fruit</b>           |       |    |       |                     |                                                                     |       |     |
| <b>Canned fruit, assorted</b> | 939   | kg | 2.176 | Veolia (2016)       | Canned Fruit                                                        | 2044  |     |
| <b>Peach in syrup</b>         | 5678  | kg | 2.176 | Veolia (2016)       | Canned Fruit                                                        | 12356 |     |
| <b>Pineapple in juice</b>     | 43    | kg | 2.176 | Veolia (2016)       | Canned Fruit                                                        | 93    |     |
| <b>Nuts</b>                   |       |    |       |                     |                                                                     |       |     |
| <b>Nuts</b>                   | 318   | kg | 0.663 | ADEME               | Walnuts                                                             | 211   | 30% |
| <b>Walnuts</b>                | 131   | kg | 0.663 | ADEME               | Whole walnuts - net weight in shop                                  | 87    | 30% |
| <b>Vegetables and pulses</b>  |       |    |       |                     |                                                                     |       |     |
| <b>Garlic</b>                 | 3000  | kg | 0.57  | Observatorio CO2web | Place of calculation: United Kingdom                                | 1710  |     |
| <b>Pumpkin</b>                | 10792 | kg | 0.729 | ADEME               | Pumpkin - net shop weight                                           | 7867  | 30% |
| <b>Onion</b>                  | 35610 | kg | 0.485 | ADEME               | Onions - net shop weight                                            | 17271 | 30% |
| <b>Lettuce</b>                | 25440 | kg | 0.479 | ADEME               | Salad - net shop weight - Agricultural production system: espYearla | 12186 | 30% |
| <b>Sweet corn</b>             | 544   | kg | 0.701 | ADEME               | Maize - net shop weight                                             | 381   | 30% |
| <b>Potatoes</b>               | 76707 | kg | 0.585 | ADEME               | Potato - net shop weight                                            | 44874 | 30% |
| <b>Cucumbers</b>              | 22699 | kg | 1.38  | ADEME               | Cucumber - seasonal - net weight in shop                            | 31324 | 30% |
| <b>Peppers</b>                | 2728  | kg | 0.871 | ADEME               | Pepper - net shop weight                                            | 2376  | 30% |
| <b>Tomatoes</b>               | 94872 | kg | 0.343 | ADEME               | Tomato - fresh seasonal, France - net in-store weight               | 32541 | 30% |

|                                           |        |    |       |               |                                                                                                                                     |        |     |
|-------------------------------------------|--------|----|-------|---------------|-------------------------------------------------------------------------------------------------------------------------------------|--------|-----|
| <b>Fresh vegetables</b>                   | 91024  | kg | 0.259 | ADEME         | Fruit (or vegetable) - generic, seasonal, locally produced - net weight in shop                                                     | 23575  | 30% |
| <b>Tomato preserves</b>                   | 242519 | kg | 1.41  | ADEME         | Tomato - pulp or peeled - net weight in shop                                                                                        | 341951 | 30% |
| <b>Lentils</b>                            | 149    | kg | 0.887 | ADEME         | Green lentils - net weight in shop                                                                                                  | 132    | 30% |
| <b>Various pulses</b>                     | 1610   | kg | 0.887 | ADEME         | Green lentils - net weight in shop                                                                                                  | 1428   | 30% |
| <b>Eggs</b>                               |        |    |       |               |                                                                                                                                     |        |     |
| <b>Eggs</b>                               | 6596   | kg | 2.090 | ADEME         | Egg - national average - net weight in shop. Representing the French egg market, with an industrial part and an outdoor/label part. | 13785  | 30% |
| <b>Quail eggs</b>                         | 23     | kg | 2.090 | ADEME         | Egg - national average - net weight in shop. To represent the French egg market, with an industrial part and an outside/label part. | 48     | 30% |
| <b>Fish</b>                               |        |    |       |               |                                                                                                                                     |        |     |
| <b>Tuna in vegetable oil</b>              | 39     | kg | 3.160 | ADEME         | Canned tuna - net weight in shop                                                                                                    | 124    | 30% |
| <b>Canned fish, assorted</b>              | 781    | kg | 3.70  | Veolia (2016) | Canned fish. Exotic fish and canned tuna                                                                                            | 2890   |     |
| <b>Ready to eat meals</b>                 |        |    |       |               |                                                                                                                                     |        |     |
| <b>Assorted frozen ready to eat meals</b> | 6908   | kg | 6.780 | Veolia (2016) | Prepared meals. Based on the ADEME V11 "composite meal"                                                                             | 46836  | 30% |
| <b>Canned ready to eat meals assorted</b> | 681    | kg | 4.389 | ADEME         | Average of the following ready meals: lasagne (2.91 kgCO <sub>2</sub> e/serving, serving 0.594), beans with meat (2.37              | 2989   | 30% |



|                                    |       |    |       |                      |                                                                                                                                                                                                                                                                       |        |     |
|------------------------------------|-------|----|-------|----------------------|-----------------------------------------------------------------------------------------------------------------------------------------------------------------------------------------------------------------------------------------------------------------------|--------|-----|
|                                    |       |    |       |                      | kgCO <sub>2</sub> e/serving, serving 0.37),<br>pasta with ham (1.36<br>kgCO <sub>2</sub> e/serving, serving 0.535),<br>chicken with curry rice (1.19<br>kgCO <sub>2</sub> e/serving, serving 0.567),<br>cou cous (4.92 kgCO <sub>2</sub> e/serving,<br>serving 0.82). |        |     |
| <b>Assorted ready to eat meals</b> | 50219 | kg | 6.78  | Veolia (2016)        | Prepared meals. Based on the ADEME V11 "composite meals"                                                                                                                                                                                                              | 340484 |     |
| <b>Frozen pizzas</b>               | 805   | kg | 5.112 | ADEME                | Pizza: ready-to-eat meals. Mass of consumable ingredients for one portion (kg): 0.143                                                                                                                                                                                 | 4114   | 30% |
| <b>Chilled pizzas and Others</b>   | 3302  | kg | 5.112 | ADEME                | Pizza: ready-to-eat dishes. Mass of consumable ingredients for one portion (kg): 0,143                                                                                                                                                                                | 16881  | 30% |
| <b>Assorted soups</b>              | 60    | kg | 0.873 | Veolia (2016)        | Soups                                                                                                                                                                                                                                                                 | 52     |     |
| <b>Various broths</b>              | 29144 | kg | 0.873 | Veolia (2016)        | Soups                                                                                                                                                                                                                                                                 | 25443  |     |
| <b>Gazpacho</b>                    | 72    | kg | 2.000 | Veolia (2016)        | Miscellaneous foods                                                                                                                                                                                                                                                   | 144    |     |
| <b>Assorted creams</b>             | 11189 | kg | 5.320 | Observatorio CO2web  | Creams                                                                                                                                                                                                                                                                | 59523  |     |
|                                    |       |    |       |                      |                                                                                                                                                                                                                                                                       |        |     |
|                                    |       |    |       |                      |                                                                                                                                                                                                                                                                       |        |     |
| <b>Hygiene products</b>            |       |    |       |                      |                                                                                                                                                                                                                                                                       |        |     |
| <b>Grooming drugstore</b>          | 1319  | kg | 2.000 | Veolia (2016)        | Hygiene products                                                                                                                                                                                                                                                      | 2638   |     |
| <b>Cleaning drugstore</b>          | 80    | kg | 2.000 | ADEME                |                                                                                                                                                                                                                                                                       | 159    | 30% |
| <b>Diapers</b>                     | 1034  | kg | 2.000 | Veolia (2016)        | Hygiene products                                                                                                                                                                                                                                                      | 2068   |     |
|                                    |       |    |       |                      |                                                                                                                                                                                                                                                                       |        |     |
| <b>Dairy products</b>              |       |    |       |                      |                                                                                                                                                                                                                                                                       |        |     |
| <b>Assorted dairy desserts</b>     | 9591  | kg | 2.52  | ECODES MITECO (2019) | dairy desserts                                                                                                                                                                                                                                                        | 24170  |     |

|                                  |         |    |       |               |                                                                                                                                                               |         |     |
|----------------------------------|---------|----|-------|---------------|---------------------------------------------------------------------------------------------------------------------------------------------------------------|---------|-----|
| <b>assorted yogurts</b>          | 253661  | kg | 2.88  | ADEME         | Yogurt - store net weight.<br>Quantity of milk considered for a kg of yogurt: 1.5 kg.<br>Approximation to use any type of yogurt (flavored, whole milk, etc.) | 730545  | 30% |
| <b>Custard</b>                   | 579     | kg | 2.90  | ADEME         | Crème brûlée - ready-to-eat dishes. One serving: 0.187                                                                                                        | 1681    | 30% |
| <b>fresh cheeses</b>             | 446     | kg | 3.510 | ADEME         | Fresh cow cheese, 58% fat - net store weight                                                                                                                  | 1567    | 30% |
| <b>assorted cheeses</b>          | 713     | kg | 4.94  | ADEME         | Average of hard cheese (Emmental type) and soft cheese (Camembert type) - net weight in store                                                                 | 3524    | 30% |
| <b>assorted milk</b>             | 89925   | l  | 1.22  | ADEME         | Milk - cow's milk, semi-skimmed, pasteurized - store net weight.<br>Approximation to use in all milks                                                         | 109709  | 30% |
| <b>fresh milk</b>                | 1130    | kg | 1.220 | ADEME         | Milk - cow's milk, semi-skimmed, pasteurized - store net weight.<br>Approximation to use in all milks                                                         | 1379    | 30% |
| <b>Milk powder</b>               | 80      | kg | 2.000 | Veolia (2016) | various foods                                                                                                                                                 | 160     |     |
| <b>butters</b>                   | 2428    | kg | 9.490 | ADEME         | Sweet butter - net store weight                                                                                                                               | 23042   | 30% |
| <b>Varied snacks</b>             |         |    |       |               |                                                                                                                                                               |         |     |
| <b>Chips</b>                     | 1622    | kg | 1.776 | ADEME         | chips. Portion 0.196                                                                                                                                          | 2879    | 30% |
| <b>Fries and assorted snacks</b> | 9646    | kg | 1.776 | ADEME         | chips. Portion 0.196                                                                                                                                          | 17127   | 30% |
| <b>Assorted cereal bar</b>       | 7792    | kg | 2.000 | Veolia (2016) | various foods                                                                                                                                                 | 15585   |     |
| <b>assorted olives</b>           | 7331    | kg | 0.858 | ADEME         | Olives in jar, net weight in store                                                                                                                            | 6290    | 30% |
| <b>Total</b>                     | 2767536 | kg |       |               |                                                                                                                                                               | 4271808 |     |

ADEME, Agence de la transition écologique (2020) Base de données Bilan Carbone, Base Carbone V11 [Online] <https://www.bilans-ges.ademe.fr/en/accueil>.

Cátedra de Ética Ambiental (2020) Observatorio CO2 web [Online] Fundación Tatiana Pérez de Guzmán el Bueno, Universidad de Alcalá. <https://huellaco2.org/alimentos.php>.

ECODES, Fundación Ecología y Desarrollo (2019) *Prevención de la contaminación e impacto climático en función de la selección de las diferentes alternativas de alimentación. Fundación Ecología y Desarrollo. Ministerio para la Transición Ecológica de España. Retrieved from https://ecodes.org/documentos/4\_Documentacion-MITECO.pdf*

Guilhem Julien (2016) *Rapport sur l'empreinte environnementale liée à l'activité de la banque alimentaire de bordeaux & de la gironde en 2015*. Veolia Environnement S.A. for the the food bank of bordeaux & gironde. Bordeaux, France. Technical report.

\* The products considered are those that avoid food waste:

- Manufacturers and distributors
- Fruits and vegetables from market withdrawals (the Fruit and Vegetable Producers Organisation)
- PRC (surplus from commercial surfaces)
- Other Food Banks

Table S12: Activities and emission factors in a scenario without the FBN, Waste management, products whose donors are in the PRC (2018).

| Origin              | Waste fractions* | Unit     | Activity data (kg) | Emission factor (kgCO <sub>2</sub> eq/kg) | Source        | Comments                                                       | Emissions kg CO <sub>2</sub> e |
|---------------------|------------------|----------|--------------------|-------------------------------------------|---------------|----------------------------------------------------------------|--------------------------------|
| Landfill            | 9.1              | %        | 70829              | 0.624                                     | PRC (2018)    | 0.624 tCO <sub>2</sub> eq/ t of organic matter during 30 Years | 44198                          |
| Organic matter      | 49.0             | %        | 381357             |                                           |               |                                                                | 34785                          |
| Biomethanisation    | 53.0             | %        | 202119             | 0.020                                     | MITECO (2020) | Spain                                                          | 4042                           |
| Composting          | 47.0             | %        | 179238             | 0.172                                     | MITECO (2020) | Spain                                                          | 30743                          |
| Paper and cardboard | 8.7              | %        | 67375              | 0.052                                     | OCCC (2020)   | Catalonia                                                      | 3512                           |
| Light packaging     | 27.2             | %        | 211299             | 0.016                                     | OCCC (2020)   | Catalonia                                                      | 3429                           |
| Glass               | 6.1              | %        | 47277              | 0.007                                     | OCCC (2020)   | Catalonia                                                      | 354                            |
| <b>Total</b>        | <b>100</b>       | <b>%</b> | <b>778137</b>      |                                           |               |                                                                | <b>86278</b>                   |

OCCC, Oficina Catalana del Cambio Climático (2020) *Calculation of GHG emissions derived from municipal waste management*.

**Gobierno de Navarra (2020)** *Oficina de Prevención de Residuos y de Impulso de la Economía Circular, Limitaciones que Abren Puertas* [Online] [Cited: 4 may 2022] <https://oprec-navarra.com/limitaciones-abren-puerta/>.

**MITECO, Ministerio para la Transición Ecológica y el Reto Demográfico (2020)** *Inventario Nacional de Gases de Efecto Invernadero*. Gobierno de España.

**PRC (2018)** personal communication from Álvaro Miranda, from the PRC, April 16, 2020.

\* Inventory of household and commercial waste for the PRC (Government of Navarra, 2019) reweighted to exclude the "Other" fraction composed of items not handled by the FBN (batteries, medicines, electrical and electronic products). Values reweighted according to the composition percentages of the waste fraction container.

Table S13: Activities and emission factors in a scenario without the FBN, Waste management, Products originating in Navarra (except for the PRC) (2018).

| Origin           | Waste fractions (%) | Activity data (kg) | Emission factor | Unit                    | Source        | Comments  | Emissions     | Unit                      |
|------------------|---------------------|--------------------|-----------------|-------------------------|---------------|-----------|---------------|---------------------------|
| Landfill         | 35.0                | 298601             | 0.625           | kgCO <sub>2</sub> eq/kg | OCCC (2020)   | Catalonia | 186479        | kg CO <sub>2</sub> e      |
| Biomethanisation | 64.1                | 547213             | 0.020           | kgCO <sub>2</sub> eq/kg | MITECO (2020) | Spain     | 10944         | kg CO <sub>2</sub> e      |
| Light packaging  | 0.1                 | 740                | 0.016           | kgCO <sub>2</sub> eq/kg | OCCC (2020)   | Catalonia | 12            | kg CO <sub>2</sub> e      |
| Refuse           | 0.8                 | 6590               | -               | -                       |               |           |               |                           |
| <b>Total</b>     | <b>99</b>           | <b>853145</b>      |                 |                         |               |           | <b>197435</b> | <b>kg CO<sub>2</sub>e</b> |

**OCCC, Oficina Catalana del Cambio Climático (2020)** *Calculation of GHG emissions derived from municipal waste management*.

**MITECO, Ministerio para la Transición Ecológica y el Reto Demográfico (2020)** *Inventario Nacional de Gases de Efecto Invernadero*. Gobierno de España.

Table S14: Activities and emission factors in a scenario without the FBN, Waste management, Products originating in the rest of Spain (except Catalonia) (2018).

| C.1. Rest of Spain | Waste fractions * (%) | Activity data** (kg) | Emission factor | Unit                    | Source        | Comments  | Emissions     | Unit                      |
|--------------------|-----------------------|----------------------|-----------------|-------------------------|---------------|-----------|---------------|---------------------------|
| Landfill           | 35.0                  | 198845               | 0.625           | kgCO <sub>2</sub> eq/kg | OCCC (2020)   | Catalonia | 124181        | kg CO <sub>2</sub> e      |
| Biomethanisation   | 64.1                  | 364403               | 0.020           | kgCO <sub>2</sub> eq/kg | MITECO (2020) | Spain     | 7288          | kg CO <sub>2</sub> e      |
| Light packaging    | 0.1                   | 493                  | 0.016           | kgCO <sub>2</sub> eq/kg | OCCC (2020)   | Catalonia | 8             | kg CO <sub>2</sub> e      |
| Refuse             | 0.8                   | 4389                 | -               | -                       |               |           |               |                           |
| <b>Total</b>       | <b>100</b>            | <b>568130</b>        |                 |                         |               |           | <b>131477</b> | <b>kg CO<sub>2</sub>e</b> |

OCCC, Oficina Catalana del Cambio Climático (2020) *Calculation of GHG emissions derived from municipal waste management.*

MITECO, Ministerio para la Transición Ecológica y el Reto Demográfico (2020) *Inventario Nacional de Gases de Efecto Invernadero.* Gobierno de España.

\* Waste fractions taken from the waste managers of the FBN in Navarra.

\*\*Data on the activity of distributors and manufacturers, other Food Banks and the Fruit and Vegetable Producers Organisation.

Table S15: Activities and emission factors in a scenario without the FBN, Waste management, Products originating in Catalonia (2018).

| C.2. Rest of Spain  | Waste fractions * (%) | Activity data** (kg) | Emission factor | Unit                    | Source      | Comments  | Emissions    | Unit                      |
|---------------------|-----------------------|----------------------|-----------------|-------------------------|-------------|-----------|--------------|---------------------------|
| Landfill            | 5.8                   | 33208                | 0.625           | kgCO <sub>2</sub> eq/kg | OCCC (2020) | Catalonia | 20739        | kg CO <sub>2</sub> e      |
| Paper and cardboard | 19.8                  | 112419               | 0.052           | kgCO <sub>2</sub> eq/kg | OCCC (2020) | Catalonia | 5860         | kg CO <sub>2</sub> e      |
| Light packaging     | 16.6                  | 94395                | 0.016           | kgCO <sub>2</sub> eq/kg | OCCC (2020) | Catalonia | 1532         | kg CO <sub>2</sub> e      |
| Others***           | 57.8                  | 328107               | -               | -                       |             |           |              |                           |
| <b>Total</b>        | <b>100</b>            | <b>568130</b>        |                 |                         |             |           | <b>28131</b> | <b>kg CO<sub>2</sub>e</b> |

OCCC, Oficina Catalana del Cambio Climático (2020) *Calculation of GHG emissions derived from municipal waste management.*

\* Waste fractions taken from FBN's waste managers in Catalonia.

\*\*Data on the activity of distributors and manufacturers, other Food Banks and the Fruit and Vegetable Producers Organisation.

\*\*\*Other refers to: specific treatments, other, management through a collection and transfer centre, use in agriculture, municipal collection, recycling and reuse of wood.

Table S16: Activities and emission factors in a scenario without the FBN, total Waste management in the rest of Spain (2018).

| Total rest of Spain | Emissions     | Unit                      |
|---------------------|---------------|---------------------------|
| <b>Total</b>        | <b>159608</b> | <b>kg CO<sub>2</sub>e</b> |

Table S17: Activities and emission factors in a scenario without the FBN, Waste management total data (2018).

| Total waste management | Emissions     | Unit                      |
|------------------------|---------------|---------------------------|
| <b>Total</b>           | <b>443322</b> | <b>kg CO<sub>2</sub>e</b> |

Table S18: Quantity (tonnes) and GHG emissions (in tonnes CO<sub>2</sub>e and percentage) of food donations by food category to the Food Bank of Navarra in 2018.

| Food Category                 | Quantity (t) | GHG Emissions<br>(kg CO <sub>2</sub> e/kg) | GHG Emissions<br>(%) |
|-------------------------------|--------------|--------------------------------------------|----------------------|
| Dairy products                | 359          | 896                                        | 21.0                 |
| Unscheduled food              | 215          | 532                                        | 12.5                 |
| Vegetables and legumes        | 608          | 518                                        | 12.1                 |
| Prepared dishes               | 102          | 496                                        | 11.6                 |
| Fruits                        | 703          | 466                                        | 10.9                 |
| Canned vegetables/legumes     | 364          | 317                                        | 7.4                  |
| Beverages                     | 125          | 269                                        | 6.3                  |
| Pastries, biscuits and sweets | 102          | 229                                        | 5.4                  |
| Meats                         | 34           | 174                                        | 4.1                  |

|                                 |             |             |              |
|---------------------------------|-------------|-------------|--------------|
| Condiments and sauces           | 65          | 169         | 4.0          |
| Cereals, flour, bread and pasta | 43          | 102         | 2.4          |
| Assorted snacks                 | 26          | 42          | 1.0          |
| Preserved fruits                | 7           | 14          | 0.3          |
| Cocoa and chocolate             | 3           | 14          | 0.3          |
| Eggs                            | 7           | 14          | 0.3          |
| Coffees and infusions           | 2           | 9           | 0.2          |
| Fish                            | 1           | 3           | 0.1          |
| Children's food                 | 0           | 1           | 0.01         |
| Nuts                            | 0           | 0           | 0.001        |
| Hygiene products                | 2           | 5           | 0.1          |
| <b>Total</b>                    | <b>2768</b> | <b>4272</b> | <b>100.0</b> |

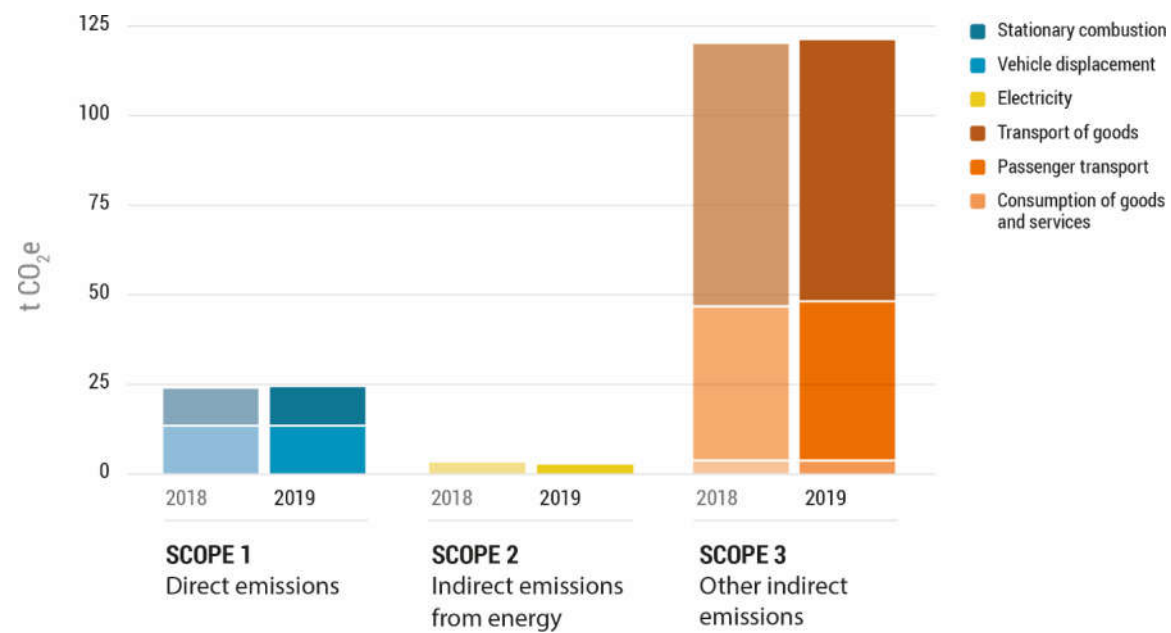

Figure S1: Comparison of greenhouse gas emissions from the activities of the Food Bank of Navarra by scope between 2018 and 2019 (tonnes CO<sub>2</sub>e).



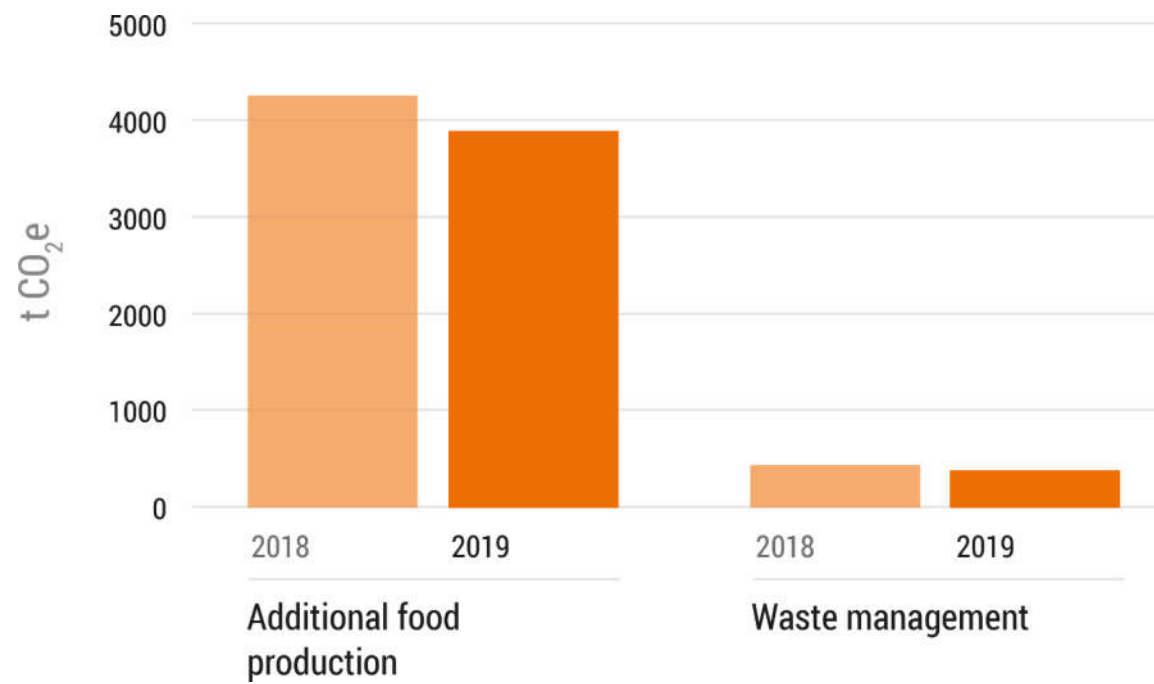

Figure S2: Comparison of greenhouse gas emissions by category in a scenario “without the action of the Food Bank of Navarra” between 2018 and 2019 (tonnes of CO<sub>2</sub>e).

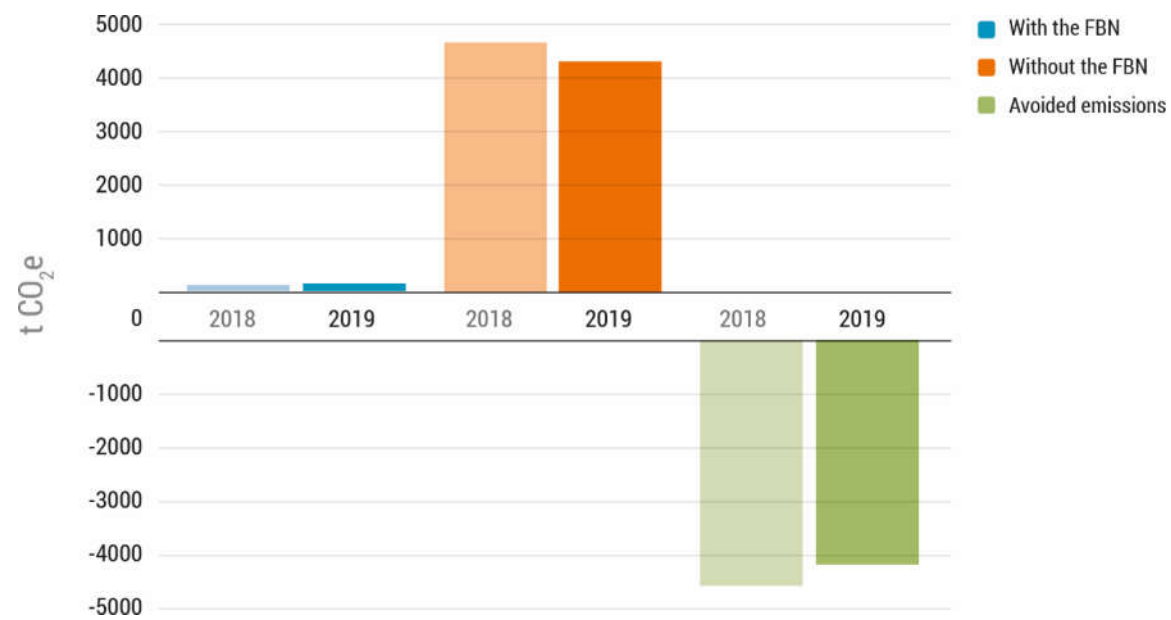

Figure S3: Comparison of total greenhouse gas emissions in the scenarios "with" and "without" the action of the Food Bank of Navarra, and emissions avoided by the Food Bank of Navarra between 2018 and 2019 (tonnes of CO<sub>2</sub>e).
